1

2 Multi-omics approach to identify bacterial polyynes and unveil their  
3 antifungal mechanism against *Candida albicans*

4

5

6 Ching-Chih Lin<sup>1#</sup>, Sin Yong Hoo<sup>1#</sup>, Chih Lin<sup>1</sup>, Kai-Fa Huang<sup>2</sup>, Ying-Ning Ho<sup>3</sup>, Chi-Hui  
7 Sun<sup>1</sup>, Han-Jung Lee<sup>1</sup>, Pi-Yu Chen<sup>1</sup>, Lin-Jie Shu<sup>1</sup>, Bo-Wei Wang<sup>1</sup>, Wei-Chen Hsu<sup>1</sup>,  
8 and Yu-Liang Yang<sup>1\*</sup>

9

10

11 <sup>1</sup>Agricultural Biotechnology Research Center, Academia Sinica, Taipei 11529,  
12 Taiwan

13 <sup>2</sup>Institute of Biological Chemistry, Academia Sinica, Taipei 11529, Taiwan

14 <sup>3</sup>Institute of Marine Biology and Center of Excellence for the Oceans, National  
15 Taiwan Ocean University, Keelung 20224, Taiwan

16

17

18

19

20 <sup>#</sup>These authors contributed equally to this work.

21 <sup>\*</sup>Corresponding author: Dr. Yu-Liang Yang

22 Phone number: +886-2-2787-2089

23 E-mail: [ylyang@gate.sinica.edu.tw](mailto:ylyang@gate.sinica.edu.tw)

24

25 **Abstract**

26 Bacterial polyynes are highly active natural products with a broad-spectrum of  
27 antimicrobial activities. However, their detailed mechanism of action remains unclear.  
28 Through integrating comparative genomics, transcriptomics, functional genetics, and  
29 metabolomics analysis, we identified a unique polyynone resistance gene, *masL*  
30 (encoding acetyl-CoA acetyltransferase), from the biosynthesis gene cluster (BGC)  
31 dominant for the production of antifungal polyynes (massilin A, massilin B, collimonin  
32 C, and collimonin D) in *Massilia* sp. YMA4. Phylogenetic and chemotaxonomic  
33 analyses characterized the core architecture of bacterial polyynone BGC. The  
34 crystallographic analysis of the MasL-collimonin C complex indicated that bacterial  
35 polyynes serve as a covalent inhibitor of acetyl-CoA acetyltransferase. Moreover, we  
36 confirmed that the bacterial polyynes disrupted cell membrane integrity and inhibited  
37 cell viability of *Candida albicans* by targeting ERG10 (homolog of MasL). Overall,  
38 understanding of the antifungal mechanism of bacterial polyynes presented herein  
39 will be useful for the development of polyynes for fungal infections.

40

## 41 Introduction

42 Invasive fungal infections caused by *Candida*, *Aspergillus*, *Pneumocystis*, and  
43 *Cryptococcus* spp. in humans result in approximately 1.4 million deaths per year  
44 worldwide<sup>1</sup>. *Candida albicans* is the most prevalent pathogen among the *Candida*  
45 spp., causing an invasive fungal infection called Invasive Candidiasis (IC)<sup>2</sup>. The  
46 clinical guidelines for the management of Candidiasis offered by the Infectious  
47 Diseases Society of America recommend echinocandin and azole-type drugs as  
48 initial therapy for Candidiasis<sup>3</sup>. Echinocandin inhibits fungal cell wall synthesis by  
49 targeting 1,3- $\beta$ -glucan synthase and the azoles interfere with fungal cell membrane  
50 formation by inhibiting lanosterol 14 $\alpha$ -demethylase<sup>4, 5</sup>. However, more and more  
51 azole-resistant *Candida* spp. are being isolated from hospital IC patients due to drug  
52 abuse of azoles<sup>6</sup>. Because of the increasing severity of drug resistance and the  
53 limited number of clinical drugs currently available for treatment, new types of  
54 antifungal agents are urgently required<sup>5, 7</sup>.

55 Polyynes or polyacetylenes, a substantial class of compounds derived from  
56 polyunsaturated fatty acids, contain a conformationally rigid rod-like architecture and  
57 an electron-rich consecutive acetylene moiety. Hundreds of polyynes have been  
58 discovered, out of which compounds have mostly been isolated from terrestrial  
59 plants such as (3*R*)-falcarinol and ichthyothereol<sup>8</sup>. In contrast to polyynes from plant  
60 sources, bacterial polyynes contain a distinguished terminal alkyne with conjugated  
61 systems, which causes bacterial polyynes to be more unstable. This instability has  
62 discouraged surveys of bacterial polyynes using the bioactivity-guided isolation  
63 approach. To date, only 12 bacterial polyynes have been recorded in a few species.  
64 However, these polyynes have been reported to have a broad spectrum of  
65 antimicrobial effects. For instance, cepacin, isolated from *Pseudomonas cepacia*  
66 (taxonomically reclassified as a *Burkholderia diffusa*), was reported to have anti-  
67 bacterial activity against the majority Gram-negative bacteria, staphylococci, and  
68 anti-oomycetal activity against *Pythium ultimum*<sup>9, 10</sup>; collimonins isolated from  
69 *Collimonas fungivorans* Ter331<sup>11, 12</sup> and Sch 31828 isolated from *Microbispora* sp.  
70 SCC1438<sup>13</sup> were reported to have antifungal activity against *Aspergillus niger* and  
71 *Candida* spp., respectively. Despite the apparent antibiotic effect of these  
72 compounds, the active target and mechanism(s) remain unclear.

73 Here, we delineated the antifungal mechanism of bacterial polyynes. We used a  
74 multi-omic approach to identify the bioactive polyynes of *Massilia* sp. YMA4 and

75 characterized their biosynthesis gene cluster (BGC). By comparing bacterial polyene  
76 BGCs via genome mining, we revealed that bacterial polyenes are antifungal agents  
77 that act by targeting the first enzyme of ergosterol biosynthesis, acetyl-CoA  
78 acetyltransferase. Crystallographic analysis unveiled the detailed binding model of  
79 polyenes to the acetyl-CoA acetyltransferase. This information will be useful in new  
80 antifungal drug screening and ligand-based drug design.

81

## 82 **Results**

### 83 **Transcriptomics analysis reveals polyenes as antifungal agents and their** 84 **encoding BGC in *Massilia* sp. YMA4**

85 Based on a previous survey, *Massilia* sp. YMA4 has antimicrobial effects  
86 against *Staphylococcus aureus*, *Staphylococcus epidermidis*, *Paenibacillus larvae*,  
87 and the pathogenic fungus, *C. albicans*<sup>14</sup>. In antagonism assay of *Massilia* sp. YMA4  
88 against *C. albicans*, a distinct phenotype showed that the antifungal agent was  
89 produced in potato dextrose agar (PDA) medium but not in yeast malt agar (YMA)  
90 medium (**Fig. 1a**) and this was further confirmed by disc diffusion assay. Notably, we  
91 found that the antifungal metabolites were unstable in the extract and hard to scale  
92 up for bioassay using the classic bioactivity-guided isolation approach. Therefore, to  
93 mine the antifungal metabolites, a combined transcriptomics and metabolomics  
94 approach was used to identify the compounds produced in the two different media  
95 (PDA and YMA). First, the circular genome of *Massilia* sp. YMA4 was assembled as  
96 6.33 megabase pairs (Mbp) with 5315 coding sequences (CDSs) by the PacBio  
97 sequencing system (**Fig. 1b**). Then transcriptomics analysis of *Massilia* sp. YMA4  
98 cultured in the two media, processed using the Illumina platform was conducted. It  
99 showed differential expression with 192 upregulated genes and 226 downregulated  
100 genes in PDA compared to YMA (with  $P < 0.05$  and  $|\text{fold-change}| > 2$ ,  
101 **Supplementary Fig. 1a and Data 1**). Then, we assigned these 418 differentially  
102 expressed genes (DEGs) into 77 pathways for pathway analysis using the Kyoto  
103 Encyclopedia of Genes and Genomes (KEGG)<sup>15</sup>. The results identified a total of  
104 eight significantly enriched pathways involved in different culture conditions (FDR-  
105 adjusted  $P < 0.05$ , **Supplementary Fig. 1b and Data 2**). Compared to YMA, the  
106 enriched pathways in PDA were conspicuously associated with small-molecule  
107 metabolism, especially fatty acid-related metabolism.

108 To mine the biosynthesis genes encoding the unstable antifungal metabolites,  
109 an *in-silico* BGC identification combined the results of rule-based antiSMASH  
110 (bacterial version, v.5)<sup>16</sup> and deep learning annotation DeepBGC<sup>17</sup> to characterize  
111 19 BGCs in *Massilia* sp. YMA4 (annotation list shown in **Supplementary Data 3**).  
112 Combining the BGC mining and transcriptomics results, we found that the predicted  
113 gene cluster 17 is the only BGC highly and consistently expressed with most genes  
114 in PDA compared to YMA. We named the predicted gene cluster 17 as massilin  
115 (*mas*) BGC with 12 transcribed genes (*masA* to *masL*). The unique features of *mas*  
116 BGC are genes encoding fatty acyl-AMP ligase (*masD*) and acyl carrier protein  
117 (*masG*) for fatty acid substrate loading, and modification encoding genes fatty acid  
118 desaturases (*masA*, *masE*, *masF* and *masH*) and hydrolases (*masI* and *masK*)  
119 (**Supplementary Table 1**).

120

#### 121 **Characterization of *mas* BGC producing polyynes by *Massilia* sp. YMA4**

122 To identify the metabolites of *mas* BGC, we constructed a biosynthesis-deficient  
123 mutant strain ( $\Delta masH$ ) through insertion mutation at the *masH* gene locus in *Massilia*  
124 sp. YMA4.  $\Delta masH$  lost antifungal activity against type strain ATCC18804 of *C.*  
125 *albicans* and clinically isolated fluconazole-resistant *C. albicans* and *C.tropicali*  
126 (**Supplementary Fig. 2**). Next, we conducted target isolation using the differential  
127 features identified in the UPLC-DAD-HRMS/MS analysis of wild-type and  $\Delta masH$   
128 (**Supplementary Fig. 3**). Then, we purified four major polyynes from ethyl acetate  
129 extract. Their structures were elucidated by high-resolution mass spectrometry  
130 (**Supplementary Fig. 3 and 4**) and nuclear magnetic resonance (NMR). Of the four,  
131 collimonin C **1** and collimonin D **2** were reported in a previous study isolated from *C.*  
132 *fungivorans* Ter331<sup>11</sup>. A new compound with an ene-triyne moiety was named  
133 massilin A **3**, which was identified as a racemate with a hydroxyl group at the C6  
134 position of the unsaturated hexadecanoic acid backbone. Another new compound  
135 with an ene-diyne-ene moiety named massilin B **4** was supposed to be the precursor  
136 of collimonin C **1** or collimonin D **2**. Notably, massilin B **4** is more chemically stable  
137 than other polyynes with a terminal alkyne. The four polyynes were biosynthesized  
138 by a *mas* BGC putatively derived from palmitic acid with multiple cycles of  
139 desaturation and oxidation modification.

140 For antifungal activity assay, polyynes with a terminal alkyne moiety showed  
141 potent inhibition of *C. albicans* with minimum inhibitory concentrations (MIC): 69.73

142  $\mu\text{M}$  (collimonin C **1**), 35.24  $\mu\text{M}$  (collimonin D **2**) and 2.40  $\mu\text{M}$  (massilin A **3**). However,  
143 massilin B **4** with a terminal alkene moiety had no antifungal activity with MIC > 500  
144  $\mu\text{M}$  (**Table 1** and **Supplementary Fig. 5**). These results imply that the terminal  
145 alkyne is an essential functional moiety for the antifungal activity of the polyynes.

146

### 147 **Phylogenetic analysis of polyene BGCs and their genetic-chemotaxonomy** 148 **relationship**

149 A phylogenetic analysis was performed on *mas* BGC and its homologous BGCs  
150 from finished sequenced bacterial genomes. We used fully transcribed genes of *mas*  
151 BGC as a template to process multiple sequence alignments for mining the polyene  
152 BGCs by using MultiGeneBlast<sup>18</sup> in the bacterial genome database (BCT, 2020  
153 November, NCBI) and additional genomes of polyene producing bacteria  
154 (**Supplementary Data 4**). The results revealed that polyene BGCs were  
155 discontinued in bacterial phylogeny and appeared in certain genera in bacteria.  
156 Among the homologous polyene BGCs in 56 bacteria genomes, we recognized a  
157 consensus region of polyene BGC with a unique gene cluster architecture: fatty acyl-  
158 AMP ligase (FAAL) - 2x fatty acid desaturase (FAD) - acyl carrier protein (ACP) -  
159 fatty acid desaturase (FAD).

160 In view of the conservation of the gene cluster architecture, the concatenated  
161 amino acid sequence of the consensus region was used to build a phylogenetic tree,  
162 and the bacterial species could be intergraded into 11 leaves (**Fig. 2a** and  
163 **Supplementary Data 5**). Based on the reported polyene structures (**Fig. 2b**), we  
164 configured polyene BGCs into three monophyla: the palmitate-derived polyenes  
165 family (**C16**) containing the *Massilia* group (this study, compounds **1-4**), the  
166 *Collimonas* group (*C. fungivorans* Ter331, compounds **1, 2, 7** and **8**<sup>11</sup>) and the  
167 *Burkholderia* group 2 (*B. ambifaria* BCC019, compounds **5** and **6**<sup>9</sup>) with an outgroup  
168 of *Streptomyces* group and *Amycolatopsis orientalis*; the Stearate-derived polyenes  
169 family (**C18**) contains the *Trinickia* group (*T. caryophylli*, compound **9**<sup>19, 20</sup>),  
170 *Burkholderia* group 1 (*B. gladioli* BSR3, compound **9**<sup>20</sup>), *Pseudomonas* group (*P.*  
171 *protegens* Cab57, compounds **10** and **11**<sup>21</sup>) and *Gynuella sunshinyii* (ergoynes A,  
172 polyene derivate<sup>22</sup>); and the uncharacterized monophylum with *Mycobacterium*  
173 group and *Nocardia brasiliensis*. The phylogenic and chemotaxonomy relationship  
174 suggests that polyene BGCs might first have evolved with an adaptive mutation for a  
175 different substrate-specific family before spreading within the family.

176

## 177 **MasL serves as a polyne direct target and has a protective function**

178 We further analyzed the palmitate-derived polyne (**C16**) monophylum, including  
179 *mas* BGC in *Massilia* sp. YMA4 (**Fig. 2c-i**), *ccn* BGC in *B. ambifaria* BCC019<sup>9</sup>(**Fig.**  
180 **2c-ii**), and *col* BGC in *C. fungivorans* Ter331<sup>12</sup>(**Fig. 2c-iii**). The phylogenetic  
181 analysis showed that *ccn* BGC branched out before the most recent common  
182 ancestor of *mas/col* BGCs, which implies that *ccn* BGC is the evolutionary ancestor  
183 of BGC dividing into *mas* and *col* BGCs with a deletion event, independently.  
184 Interestingly, the gene encoding major facilitator superfamily (MFS) transporter,  
185 which are implicated in multidrug resistance and transport small molecules and  
186 xenobiotics<sup>23</sup>, is preserved in *col* BGC but lost in *mas* BGC. In contrast, the *masL*,  
187 the acetyl-CoA acetyltransferase gene, remains in *mas* BGC but not in *col* BGC.  
188 Antibiotic producers often harbor resistance genes within the antibiotic BGCs for self-  
189 protection<sup>24, 25</sup>. On the other hand, drug resistance is also achieved by  
190 amplification/overexpression of the drug target<sup>26</sup>. For instance, many fluconazole-  
191 resistant strains of *Candida* spp. were reported to have overexpression of the drug  
192 target ERG11/CYP51<sup>6</sup>. To evaluate the protective effect of *masL*, we first  
193 constructed heterologous expression of *masL* in polyne-sensitive *C. albicans* (*P<sub>ter</sub>-*  
194 *masL*). The expression of *masL* rescued fungal cell viability from polyne inhibition  
195 with MIC (**Fig. 3a**). Furthermore, an *in vitro* MasL inhibition assay showed that  
196 polyynes (compounds **1-3**) inhibited the MasL enzyme activity (**Table 1**). These  
197 results suggest that *masL* serves as a self-resistance gene (SRG) in the *mas* BGC,  
198 and in addition that MasL could serve as a direct target of bacterial polyynes for  
199 further antifungal mechanistic studies.

200

## 201 **Polyynes are covalent inhibitors of acetyl-CoA acetyltransferase**

202 The nucleophilic addition by covalent inhibitors targeting of the sulfhydryl group  
203 of cysteine residues is the most widely utilized reaction for achieving irreversible  
204 binding<sup>27</sup>. For instance, arecoline was reported to be an acetyl-CoA  
205 acetyltransferase inhibitor using  $\alpha,\beta$ -unsaturated carbonyl moieties as an electrophile  
206 for the sulfhydryl group of reactive Cys126 in ACAT1 protein<sup>28</sup>. Moreover, (3*R*)-  
207 falcarinol, which contained an internal diyne moiety isolated from the plant *Daucus*  
208 *carota*, was reported to modify the chemopreventive agent-sensor Keap1 protein at  
209 Cys151 covalently<sup>29</sup>. Therefore, we proposed a nucleophilic addition mechanism on

210 polyynes as electrophiles for the reactive cysteine sulfhydryl moiety of MasL (**Fig. 3b**)  
211 and confirmed it by mass spectrometry analysis (**Supplementary Data 6**). After  
212 incubating collimonin C **1**, collimonin D **2** and massilin A **3** with MasL, respectively,  
213 two peptides were observed to have monoisotopic masses (within 5 ppm error)  
214 consistent with Cys90 modified by  $\Delta_{\text{mass}} +258$  Da ( $+C_{16}H_{18}O_3$ ) and 274 Da  
215 ( $+C_{16}H_{18}O_4$ ) (**Fig. 3c** and **Supplementary Fig. 6**). This observation of collimonin C/D  
216 ( $+C_{16}H_{18}O_4$ )- and massilin A ( $+C_{16}H_{18}O_3$ )-derived adducts of MasL Cys90 provides  
217 convincing evidence of protein S-alkylation via nucleophilic addition to the  
218 conjugated terminal alkyne. Consequently, these polyynes inhibitors (compounds **1-3**)  
219 represent targeted covalent inhibitors (TCIs) that selectively covalently modify an  
220 essential catalytic residue in MasL, leading to irreversible inhibition.

221 The selectivity of TCI is described reasonably well by the general equation  
222 (**Table 1** and **Supplementary Note**). The kinetic study showed that collimonin D **2**  
223 has a lower  $K_i$  (42.84  $\mu\text{M}$ ) than massilin A **3** (132.10  $\mu\text{M}$ ) and collimonin C **1** (297.10  
224  $\mu\text{M}$ ). This suggests that the stereochemistry of the hydroxyl group on polyynes is  
225 vital for initial non-covalent complex affinity. We assume that the stereochemistry  
226 also affects the reactivity of covalent complex formation for collimonin C **1** with a  
227 faster  $k_{\text{inact}}$  (0.09798  $\text{min}^{-1}$ ) than collimonin D **2** (0.05208  $\text{min}^{-1}$ ) and massilin A **3**  
228 (0.03449  $\text{min}^{-1}$ ). In addition, enzyme inhibition assays for acetyl-CoA  
229 acetyltransferase homolog from *C. albicans* ATCC18804 (ERG10<sub>L127S</sub>) and human  
230 transition peptide-truncated ACAT1 showed that collimonin C **1**, collimonin D **2**, and  
231 massilin A **3** would inhibit the enzyme activity of recombinant ERG10<sub>L127S</sub> and  
232 ACAT1 (**Supplementary Fig. 7**). The mass spectrometry analysis of collimonin C/D-  
233 and massilin A-derived adducts of ERG10<sub>L127S</sub> and ACAT1 also showed the polyynes  
234 to be TCIs (**Supplementary Data 6**). The results showed that polyynes would modify  
235 the reactive cysteine residues of acetyl-CoA acetyltransferase (Cys90/Cys382 in  
236 ERG10<sub>L127S</sub> and Cys126/Cys413 in ACAT1). Nevertheless, polyynes would also  
237 modify other cysteines with a highly nucleophilic sulfhydryl group (Cys166 in  
238 ERG10<sub>L127S</sub> and Cys119/Cys196 in ACAT1) but not every cysteine in protein  
239 (**Supplementary Fig. 8 and 9**). Taken together, polyynes as a lead structure are  
240 able target the reactive cysteine residues in acetyl-CoA acetyltransferase with  
241 certain selectivity.

242



243 **The MasL-collimonin C complex shares a similar interaction in the**  
244 **substrate/inhibitor to enzyme binding model**

245 We solved the crystal structures of MasL in its apo and collimonin C-bound  
246 forms at 1.78 Å and 1.66 Å resolution, respectively. The asymmetric unit (space  
247 group  $P1$  for apo MasL and  $P2_1$  for complex) of both structures contains a tetramer  
248 of the protein (**Supplementary Fig.10**), as observed in solution (20 mM Tris-HCl  
249 pH8.5, 100 mM NaCl). The monomer of MasL shares the general fold architecture  
250 reported in the type II biosynthetic thiolase family<sup>30</sup>. MasL consists of three domains:  
251 an N-terminal  $\alpha/\beta$  domain (N-domain, residues 1–121 and 251–271), a loop domain  
252 (L-domain, residues 122–250), and a C-terminal  $\alpha/\beta$  domain (C-domain, residues  
253 272–394) (**Supplementary Fig.11**). The N- and C-domains form a typical five-  
254 layered fold ( $\alpha$ - $\beta$ - $\alpha$ - $\beta$ - $\alpha$ ) as observed in the structures of other type II biosynthetic  
255 thiolases including *Zoogloea ramigera* PhaA<sup>30</sup>, *Clostridium acetobutylicum*  
256 CEA\_G2880<sup>31</sup>, *Aspergillus fumigatus* ERG10A<sup>32</sup>, and human ACAT1<sup>33</sup>. The L-  
257 domain displays an  $\alpha/\beta$  fold with a tetramerization loop associated with the C-domain  
258 (**Supplementary Fig.12**).

259 Many high-resolution atomic structural models of acetyl-CoA  
260 acetyltransferases/type II biosynthetic thiolases have been reported to date. The  
261 structures of thiolases from many organisms are similar despite the lack of sequence  
262 similarity and acyl-Co A substrate diversity. Moreover, many structural models of the  
263 substrate-binding complex revealed the Claisen condensation reaction and binding  
264 model within the reaction pocket. In our MasL and its complex model, the substrate-  
265 binding pocket was located on the surface of the enzyme facing the opposite dimer  
266 of the tetrameric assembly. The pocket was a tunnel shape of ~10 Å depth with ~6-8  
267 Å diameter for the linear pantothenic moiety of coenzyme A (CoA) extending through  
268 the reactive center. The Claisen condensation reactive center in MasL contained  
269 reactive cysteine residues Cys90 and nucleophilic activation residues His350 and  
270 Cys380 in the C-domain. In the MasL-collimonin C complex, the conjugated polyne  
271 tail extended into the MasL substrate binding site and formed a covalent bond  
272 between the terminal carbon (C16) and the reactive cysteine sulfhydryl moiety of  
273 Cys90 (**Fig. 4 and Supplementary Fig. 13**). The observation is consistent with  
274 mass spectrometry analysis indicating the irreversible covalent inhibition of polyynes  
275 on MasL or acetyl-CoA acetyltransferase/type II biosynthetic thiolases via  
276 nucleophilic addition.

277 In the further analysis of the MasL-collimonin C complex, C7-OH of collimonin C  
278 **1**, His158 of MasL, and a water molecule formed a strong polar interaction network,  
279 including a direct hydrogen bond (3.00-3.16 Å) and a water-mediated hydrogen bond  
280 between C7-OH and His158 (**Fig. 4**). The superimposition of four monomers of the  
281 MasL-collimonin C complex showed that C6-OH of collimonin C **1** had more flexibility  
282 on the spatial direction (with a dihedral angle to C7-OH from 109° to 170°) and built a  
283 sophisticated polar interaction network with the amide of Pro249 in the panthetheine  
284 loop and multiple water molecules (**Supplementary Fig. 14**). In the substrate-  
285 binding model of the thiolases, the conserved histidine residue on the covering loop  
286 formed a water-mediated hydrogen bond to the carbonyl moiety in the pantothenic  
287 part of CoA. Also, one or more water molecules mediated the hydrogen-bonding  
288 network between the hydroxyl moiety in CoA and backbone amide moieties in the  
289 panthetheine loop in thiolase<sup>34</sup>. The polar interacting residues for the collimonin C **1**  
290 (inhibitor) binding were similar to CoA (substrate) in other thiolase models therefore  
291 the collimonin C **1** competitively bound into the reaction pocket.

292 The superimposition of the inhibitor/substrate binding models, including *A.*  
293 *fumigatus* ERG10A (pdb code **6L2C**<sup>32</sup>, chain A; identity 37.8%), Human ACAT1 (pdb  
294 code **2IBU**<sup>33</sup>, chain A; identity 36.8%), *C. acetobutylicum* CEA\_G2880 (pdb code  
295 **4XL4**<sup>31</sup>, chain A; identity 48.9%) and *Z. ramigera* PhaA (pdb code **1QFL**<sup>30</sup>, chain A;  
296 identity 44.6%), showed that collimonin C **1** could align well with the phosphate-  
297 pantothenic part of CoA (**Fig. 5**). The hydrogen bond between C7-OH of collimonin C  
298 **1** and His158 of MasL was well superimposed with the polar interaction of carbonyl  
299 moiety in CoA. Even though the superimposition between C6-OH of collimonin C **1**  
300 and the  $\alpha$ -hydroxy pantoic acid moiety showed a slightly different polar network  
301 orientation due to hydroxyl moiety flexibility, the polar interaction was still conserved  
302 in the substrate/inhibitor binding model. The crystallographic analysis and *in vitro*  
303 thiolase activity assay demonstrated that the configuration of hydroxyl moiety of  
304 polyynes is vital for enzymatic affinity.

305 Surprisingly, although there was no significant induced-fit within the pocket, the  
306 collimonin C **1** caused the Arg135 on the tetramerization loop to swap to form a salt  
307 bridge across the two subunits within the binding site (**Supplementary Fig. 15**). This  
308 finding was similar to the CoA-bound thiolase in *C. acetobutylicum* CEA\_G2880 (pdb  
309 code **4XL4**<sup>31</sup>), in which the Arg133 in CEA\_G2880 formed a hydrogen bond to the  
310 phosphate moiety of CoA. The salt bridge/hydrogen bond formation on the arginine

311 in thiolase would increase the binding affinity and suggests that collimonin C **1** would  
312 stabilize the tetramer of MasL rather than disrupting the tetramerization of ACAT1 as  
313 arecoline inhibition<sup>28</sup>.

314

### 315 **Acetyl-CoA acetyltransferase as an antifungal target**

316 In this study, we confirmed that collimonin C **1**, collimonin D **2**, and massilin A **3**  
317 would inhibit the enzyme activity of acetyl-CoA acetyltransferase homolog  
318 ERG10<sub>L127S</sub> from *C. albicans* through covalent competition on the substrate binding  
319 site and the reactive cysteine residue. As acetyl-CoA acetyltransferase is the first  
320 enzyme to catalyze acetoacetyl-CoA formation for mevalonate biosynthesis,  
321 inhibition of ERG10<sub>L127S</sub> would block the mevalonate production and subsequently  
322 disrupt the squalene and ergosterol biosynthesis. Among the clinical antifungal drugs,  
323 azole drugs inhibit ergosterol biosynthesis by targeting the critical biosynthesis  
324 enzyme ERG11 and causing the dysfunction of maintenance of fluidity, permeability,  
325 and structural integrity of fungal cell membrane<sup>4</sup>. Moreover, the reduced expression  
326 of acetyl-CoA acetyltransferase homolog ERG10A in *A. fumigatus* led to severe  
327 morphological defects and increased susceptibility to oxidative and cell wall  
328 stresses<sup>32</sup>. Therefore, we carried out a transmission electron microscopy experiment  
329 and observed that polyynes disrupt the cell membrane structure (**Fig. 6a**).

330 Meanwhile, we detected that *ERG10* gene expression was upregulated during  
331 co-culture of *Massilia* sp. YMA4 with *C. albicans* (**Fig. 6b**). Furthermore, we  
332 constructed the *ERG10* overexpression strain of *C. albicans* (*P<sub>tet</sub>-ERG10*). We found  
333 that the overexpression of *ERG10* could rescue the fungal cell viability from polyne  
334 inhibition with MIC as a protective effect of heterologous expression of *Massilia* sp.  
335 YMA4 *masL* in *C. albicans* (**Fig. 6c**). Taken together, these results revealed the  
336 antifungal mechanism of the polyynes (compounds **1-3**) through targeting the acetyl-  
337 CoA acetyltransferase ERG10, resulting in *C. albicans* inducing expression of  
338 *ERG10* for tolerance to *Massilia* sp. YMA4 attack during fungal-bacterial interaction.

339

### 340 **Discussion**

341 After the Waksman platform was first introduced in the 1940s<sup>35</sup>, many natural  
342 antibiotics were systematically discovered in the chemical crosstalk of microbe-  
343 microbe interaction. Even though recent technology can rapidly explore the  
344 metabolites hidden in the interaction between host and effector, environmental

345 factors have a significant impact on antibiotic production resulting in various  
346 bioactive spectra, which should be considered in practical surveys. *Massilia* sp.  
347 YMA4 showed differential antifungal activity in response to different culture  
348 conditions. However, the antifungal activity of *Massilia* sp. YMA4 extract was too  
349 unstable to identify the active metabolites using the general bioactivity-guide  
350 isolation approach. Because of this, we instead combined transcriptomics, functional  
351 genetics, and metabolomics analyses to reveal the *mas* BGC and its products—  
352 unstable bacterial polyynes—as the principal antifungal agents of *Massilia* sp. YMA4.  
353 We succeeded in identifying two new compounds, massilin A **3** and B **4**, and two  
354 known compounds, collimonins C **1** and D **2**. Massilin B **4**, the potential precursor of  
355 collimonin C **1** or D **2**, did not contain the terminal alkyne and was more stable than  
356 other terminal alkyne-containing polyynes but lost its antifungal activity. This implies  
357 that the terminal alkyne of bacterial polyynes is a prerequisite for bioactivity and a  
358 contributor to their instability, resulting in self-polymerization.

359 Previous reports of polyne BGCs discovered through transposon mutagenesis  
360 gave partial information for characterizing the complete BGC architecture<sup>9, 11</sup>. During  
361 the genome mining of *mas* BGC, we failed to use the rule-based genome mining  
362 tools (antiSMASH<sup>16</sup>) to recognize the cluster information due to the lack of defined  
363 polyne BGC information. However, the deep learning genome mining tool  
364 (DeepBGC<sup>17</sup>) classified *mas* BGC as a type II fatty acid/polyketide synthase (FA-  
365 PKS) BGC<sup>36</sup> with indicative features, such as fatty acyl-AMP ligase (FAAL), an acyl  
366 carrier protein (ACP), fatty acid desaturases (FADs) and hydrolases. Subsequently,  
367 combining the genome mining and transcriptomics analysis results, the putative BGC  
368 was correlated to complete the characterized *mas* BGC. Further information about  
369 the polyne BGCs was attained out by blasting multiple homologs using  
370 MultiGeneBlast<sup>18</sup> with a fully transcribed *mas* BGC as a query. The BGC mining  
371 results helped us figure out the core biosynthesis architecture in polyne BGC as an  
372 arranged feature of FAAL-2x FAD-ACP-FAD. The subsequent phylogenetic analysis  
373 for the polyne BGCs by conserved core genes combined with chemotaxonomy  
374 revealed that a potential evolutionary event, substrate-specific functional evolution  
375 (palmitate and stearate) occurred prior to spreading inter-species.

376 Antibiotics encoding BGCs are important as a defensive strategy for microbial  
377 survival. Plasmids are common carriers for BGC transformation between bacteria to  
378 gain functional genes. In addition, horizontal gene transfer (HGT)<sup>37</sup> is another

379 strategy of gene transfer and usually occurs in bacteria to gain function to defeat  
380 enemies. Regarding the relationship within a sister group of polyene BGCs in  
381 palmitic-derived monophylum (*ccn* encoding cepacins and *col* encoding collimonins),  
382 HGT events hypothetically transmitted polyene BGC from *ccn* BGC into *mas* and *col*  
383 BGCs, independently. Then, a deletion event occurred with the result that the *ccn*  
384 BGC independently divided into *mas* BGC and *col* BGC each of which contained a  
385 different self-protection mechanism. The *col* BGC preserved the MFS transporter  
386 and, in contrast, *mas* BGC kept the acetyl-CoA acetyltransferase (MasL) for  
387 detoxification in polyene production.

388 In drug-target surveys, the inhibitor target has sometimes been found to serve a  
389 protective function to resist the inhibitor<sup>38, 39</sup>. In this study, we identified the acetyl-  
390 CoA acetyltransferase MasL as the direct target of the polyenes, and the homolog  
391 ERG10 in *C. albicans* could gain resistance by overexpression. This suggests that  
392 ERG10 is the antifungal target of polyenes disrupting the mevalonate and  
393 downstream ergosterol biosynthesis, and then abolishing the cell membrane integrity.  
394 The success in this case reintroduces the notion that drug targets can be discovered  
395 from screening the SRG in gain-of-function assay. Moreover, inhibition of human  
396 mitochondrial acetyl-CoA acetyltransferase ACAT1 by the bioactive polyenes  
397 (compounds **1-3**) suggested that polyenes would be a species-wide inhibitor of  
398 acetyl-CoA acetyltransferases/type II biosynthetic thiolases.

399 The mevalonate pathway metabolites are essential for cancer cell survival and  
400 growth, for example, ketogenesis is associated with prostate cancer progression<sup>40</sup>.  
401 Likewise, statins, the hypercholesterolemia drugs also showed anticancer effects on  
402 stem cell-like primary glioblastoma by inhibiting HMG-CoA reductase in mevalonate  
403 biosynthesis<sup>41</sup>. ACAT1, the first enzyme of the mevalonate biosynthesis pathway,  
404 was reported to be an important factor for tumor growth in multiple cancer cell lines<sup>28</sup>.  
405 As we revealed that bacterial polyenes could inhibit human mitochondrial ACAT1, it  
406 would be worth exploring the anticancer potential of bacterial polyenes in the future.

407 To date, acetyl-CoA acetyltransferase inhibitors have usually been designed as  
408 CoA substrate derivatives or analogs (**Supplementary Fig.16**). Notably, the binding  
409 affinity ( $K_m$ ) of acetyl-CoA acetyltransferase with CoA-derivate substrates ranges  
410 from 3.8  $\mu\text{M}$  to 1.06  $\text{mM}$ <sup>32</sup>. Compared to previous analog inhibitor reports, in which  
411  $K_i$  ranged from 1.4  $\mu\text{M}$  to 15  $\text{mM}$  and  $k_{inact}$  ranged from 0.26  $\text{min}^{-1}$  to 4  $\text{min}^{-1}$ ,  
412 bioactive polyenes in our study inhibited MasL with an equal level of binding affinity

413 ( $K_i$  from 42.84  $\mu\text{M}$  to 297.10  $\mu\text{M}$ ) but lower reaction rate ( $k_{inact}$  from 0.03  $\text{min}^{-1}$  to 0.1  
414  $\text{min}^{-1}$ )<sup>42, 43, 44</sup>. These data suggest polyynes may be a potential lead structure for drug  
415 design.

416 In covalent drug design, inhibitors with an electrophile moiety, such as nitrile,  
417 alkyne, acrylamide, epoxide, or  $\alpha,\beta$ -unsaturated carbonyl, are the major resources  
418 for covalent bond formation to the nucleophilic moieties<sup>27</sup>. For example, falcarindiol  
419 was reported to have S-alkylation at Cys151 in Keap1 protein<sup>29</sup>; however, it lacks an  
420 actual bond formation mechanism. Polyynes are a group of high electron enriched  
421 metabolites that usually react to nucleophilic moieties. In the MasL-collimonin C  
422 complex model, the terminal alkyne of polyynes was used to elaborate bond  
423 formation with the sulfhydryl moiety in MasL Cys90. Furthermore, we revealed  
424 structurally detailed substrate/inhibitor binding models of the thiolases. The  
425 superimposition of the MasL-collimonin C complex and the other CoA-thiolase  
426 complexes showed collimonin C **1** and CoA shared a similar polar interaction to bind  
427 to the thiolases. Additionally, regarding the salt bridge/hydrogen bond formation  
428 within the binding site, the induced-fit arginine/lysine residue was conserved in  
429 procaryotic species but not in eukaryotic homologous thiolases. This supposedly  
430 causes a different affinity in homologous thiolases and could highlight ligand-based  
431 drug design with species selectivity.

432 In summary, we used an integrated strategy to unveil the biosynthesis and  
433 antifungal mechanism of bacterial polyynes. A well-characterized core architecture of  
434 bacterial polyynase BGC was attained which allowed the exploration of new bacterial  
435 polyynes further using genome mining. We illustrated the antifungal mechanism of  
436 collimonin C **1**, collimonin D **2**, and massilin A **3** through inhibiting the acetyl-CoA  
437 acetyltransferase ERG10 in *C. albicans*. The crystallographic analysis provided  
438 detailed structural insight into the MasL-collimonin C complex, which will provide  
439 useful information for designing new inhibitors of acetyl-CoA acetyltransferase.  
440 These results will help future research in bacterial polyynase mining, biosynthesis, and  
441 the structure-activity relationship to develop new antifungal or anticancer drugs.

442

## 443 **Methods**

### 444 **Genome mining and phylogenetic analysis of polyynase biosynthesis gene** 445 **clusters**

446 The biosynthesis gene clusters (BGCs) in the genome of *Massilia* sp. YMA4  
447 were characterized via command-line program DeepBGC<sup>17</sup> and online software  
448 antiSMASH<sup>16</sup> with default settings, and integrated with the criteria: antiSMASH score  
449 > 1500, DeepBGC score > 0.7. Then, the *mas* BGC of *Massilia* sp. YMA4 was used  
450 to discover the homologous gene clusters in bacteria species using MultiGeneBlast<sup>18</sup>.  
451 The database was built with a bacterial sequences database (BCT, 2020 December  
452 01) and whole-genome sequences of polyene-reported bacterial species from NCBI.  
453 A total of 56 bacteria with polyene BGC (Cumulative Blast bit score > 1500) were  
454 found. The homologous protein sequences of each bacterial polyene BGC were  
455 respectively concatenated (total of five amino sequences, starting from MasD  
456 homolog to MasH homolog). The concatenated protein sequences were used for  
457 alignment (MUSCLE) and the distance (UPGMA, bootstrap 5000 times) between 56  
458 bacteria with *Massilia* sp. YMA4 was identified for phylogenetic tree construction.  
459 The analysis was completed by using MEGA 10 with default parameters<sup>45</sup>. iTOL was  
460 used to present the results of phylogenetic analysis<sup>46</sup>.

461

#### 462 **Mass spectrometry analysis and peptide mapping of polyene-labeled peptides** 463 **in MasL, ERG10<sub>L127S</sub>, and ACAT1**

464 Incubation mixture (20  $\mu$ L) containing 2  $\mu$ M protein in 50 mM Tris pH 8.5, 100  
465 mM NaCl, was incubated with 40  $\mu$ M collimonin C **1**, collimonin D **2**, or massilin A **3**  
466 at 25°C for 3 h. The reaction was quenched by adding 4x Laemmli sample buffer  
467 (Bio-Rad, USA) with 5 mM DL-dithiothreitol and the protein was separated using  
468 SDS-PAGE. The in-gel trypsin digestion was performed with a substrate-to-enzyme  
469 ratio of 25:1 (w/w), and the mixture was incubated at 37°C for 20 h<sup>47</sup>. The resultant  
470 peptide mixtures were dried and frozen at -20°C until separation by reverse-phase  
471 nanoUPLC-ESI-MS. The tryptic peptides were re-dissolved in 10  $\mu$ L of 0.1% formic  
472 acid. An LC-nESI-Q Exactive mass spectrometer (Thermo Scientific, USA) coupled  
473 with an online nanoUPLC (Dionex UltiMate 3000 Binary RSLCnano) was used for  
474 analysis. An Acclaim PepMap 100 C18 trap column (75  $\mu$ m x 2.0 cm, 3  $\mu$ m, 100 Å,  
475 Thermo Scientific, USA) and an Acclaim PepMap RSLC C18 nanoLC column (75  $\mu$ m  
476 x 25 cm, 2  $\mu$ m, 100 Å) were used with a linear gradient from 5% to 35% of  
477 acetonitrile in 0.1% (v/v) formic acid for 40 min at a flow rate of 300 nL/min. The MS  
478 data were collected in the data-dependent mode with a full MS scan followed by 10

479 MS/MS scans of the top 10 precursor ions from the full MS scan. The MS scan was  
480 performed with 70,000 resolution over the mass-to-charge ( $m/z$ ) range 350 to 1600,  
481 and dynamic exclusion was enabled. The data-dependent MS/MS acquisition was  
482 performed with a two  $m/z$  isolation window, 27% normalized collision energy, and  
483 17,500 resolution.

484 The data were processed using Proteome Discoverer (version 2.4; Thermo  
485 Scientific, USA), and the peptides were identified by searching the MS/MS spectra  
486 against the MasL, ERG10<sub>L127S</sub>, and ACAT1 using the Mascot search engine (version  
487 2.3; Matrix Science, UK) and SEQUEST search engine<sup>48</sup>. Cysteine alkylation was  
488 used as a dynamic modification, and the modification  $m/z$  values were +274.121  
489 (+C<sub>16</sub>H<sub>18</sub>O<sub>4</sub> for collimonin C/D) and +258.126 (+C<sub>16</sub>H<sub>18</sub>O<sub>3</sub> for massilin A),  
490 respectively. For identification, the false discovery rate was set to 0.01 for peptides,  
491 proteins, and sites. The minimum peptide length allowed was four amino acids,  
492 precursor mass tolerance for 10 ppm, and fragment mass tolerance for 0.02 Da.

493

#### 494 **Enzymatic inhibition assay and inhibition kinetics of polyynes**

495 The enzymatic inhibition assay was initiated by adding 50  $\mu$ M polyynes  
496 (collimonin C **1**, collimonin D **2**, and massilin A **3**) into 10  $\mu$ M ERG10<sub>L127S</sub> or ACAT1  
497 at 25°C for 1 h. The residue active enzyme reaction started by adding 10 mM acetyl-  
498 CoA for another 1 h at 25°C in a total of 12  $\mu$ L volume with the following  
499 concentrations: 8.33  $\mu$ M enzymes, 41.65  $\mu$ M polyynes, and 1.67 mM acetyl-CoA.  
500 The reaction was quenched by adding 1  $\mu$ L of 1% formic acid. The monitor method  
501 of releasing CoA using a fluorescent probe (7-diethylamino-3-(4-maleimidophenyl)-4-  
502 methylcoumarin, CPM) was modified from previous research<sup>49</sup>. The released CoA  
503 was used to represent the residual activity or protein occupancy. After 10 min, the  
504 pH value was adjusted by 2  $\mu$ L 0.1 M Tris pH10 and 100  $\mu$ M CPM probe was added  
505 in a total volume of 105  $\mu$ L for 30 min reaction at 30°C followed by detection of the  
506 fluorescent signal using a BioTek Synergy H1 microplate reader (excitation 355 nm;  
507 emission 460 nm). Relative fluorescence intensity was obtained by subtracting the  
508 fluorescence intensity of the polyne-free reaction system.

509 To measure the inhibition kinetics of the polyynes to MasL, different polyne  
510 concentrations as indicated were reacted with the protein for inhibition reaction and  
511 then enzymatic reaction as described above. Protein occupancy and inhibition kinetic



512 calculations were performed using GraphPad Prism8 (GraphPad Software, USA; see  
513 details in the **Supplementary Notes**).

514

### 515 **Protein Crystallization, Data Collection, Processing, and Refinement**

516 For MasL-collimonin C complex preparation, 20  $\mu$ M MasL was incubated with  
517 100  $\mu$ M collimonin C in 20 mM Tris-HCl pH 8.5, and 100 mM NaCl. The MasL-  
518 collimonin C complex was purified with a gel-filtration (Superdex 200 Increase  
519 10/300) column.

520 A freshly thawed aliquot of MasL and MasL-collimonin C complex was  
521 concentrated to 20 mg/ml for an initial crystallization screening of ca. 500 conditions  
522 (Academia Sinica Protein Clinic, Academia Sinica). The crystallization conditions  
523 were manually refined to the final conditions: for MasL, 2% (v/v) Tacsimate pH 7.0,  
524 16% (w/v) polyethylene glycol 3,350, and 0.1 M HEPES, pH 7.5; for MasL-collimonin  
525 C complex, 20% (w/v) polyethylene glycol 3,350 and 0.2 M tri-lithium citrate, pH 8.  
526 The crystals were grown at 10°C by mixing the protein aliquot with an equivalent  
527 volume of crystallization buffer via the hanging drop vapor-diffusion method. For X-  
528 ray data collection, the crystals were immediately flash-frozen in liquid nitrogen after  
529 dipping into cryoprotectant composed of crystallization solution supplemented with  
530 10% (v/v) glycerol.

531 X-ray diffraction experiments were conducted at 100K at the TLS beamline 15A  
532 or the TPS beamline 05A of the National Synchrotron Radiation Research Center  
533 (Hsinchu, Taiwan) with a wavelength of 1 Å. All diffraction data were processed and  
534 scaled with the HKL-2000 package<sup>50</sup>. The data collection statistics are listed in **Table**  
535 **2**. The resulting MasL crystals had a space group of *P1* with four MasL molecules in  
536 an asymmetric unit and a solvent content of ca. 56%. The MasL-collimonin C  
537 complex crystals had a space group of *P2*<sub>1</sub> with one asymmetric unit containing four  
538 MasL molecules and a solvent content of ca. 51%<sup>51</sup>.

539 The structures of MasL and MasL-collimonin C complex were solved by the  
540 molecular replacement method with the program Molrep<sup>52</sup> using the structure of  
541 thiolase from *Clostridium acetobutylicum* (pdb code **4N44**) as the search model.  
542 Computational model building was conducted with ARP/wARP or Buccaneer<sup>53, 54</sup>,  
543 and the rest of the models were manually built with Coot.<sup>55</sup> The resulting models  
544 were subjected to computational refinement with Refmac5.<sup>56</sup>

545 The collimonin C and well-ordered water molecules were located with Coot. The  
546 stereochemical quality of the refined models was checked with MolProbity<sup>57</sup>. Finally,  
547 the MasL and MasL-collimonin C complex's refinement converged at a  
548 final  $R$  factor/ $R_{\text{free}}$  of 0.128/0.180 and 0.114/0.162, respectively. The final refinement  
549 statistics are listed in **Table 2**. The refined models of MasL and MasL-collimonin C  
550 complex were deposited in the Protein Data Bank with pdb codes **7EI3** and **7EI4**,  
551 respectively. The molecular figures were produced with Maestro (**Schrödinger**  
552 **Release 2021-1**: Maestro, Schrödinger, LLC, USA).

553

### 554 **Minimum inhibitory concentration determination and genetic rescue assay**

555 The minimum inhibitory concentration (MIC) measurement was modified from R  
556 J Lambert's method<sup>58</sup>. Different concentrations (300.00, 150.00, 75.00, 37.50, 18.75,  
557 9.38, 4.69, 2.34, 1.17, 0.59, 0.29  $\mu\text{M}$ ) of collimonin C **1**, collimonin D **2**, massilin A **3**,  
558 atorvastatin, and amphotericin B were prepared in yeast extract-peptone-dextrose  
559 (YPD). The *C. albicans* cell viabilities were seeded with initial O.D. 0.05 (600 nm)  
560 and incubated at 37°C. After 24 h incubation, the final O.D. was recorded by Epoch 2  
561 Microplate (BioTek Instruments, USA) for MIC calculation.

562 For genetic rescue assay, the *ERG10* overexpression and *masL* heterologous  
563 expression strains were seeded with O.D. 0.05 at 600 nm in YPD treated with MIC of  
564 each polyynes at 37°C and supplied with 40  $\mu\text{g}/\text{mL}$  doxycycline for gene expression.  
565 The *C. albicans* cell viabilities were recorded at 24 h.

566 The experimental results include at least three biological replicates, and the cell  
567 viabilities were normalized to the mock treatment. The statistical results were  
568 analyzed using GraphPad Prism 8 (GraphPad Software, USA) with multiple t-test  
569 analyses (FDR < 0.05). The MIC of polyynes was built with cell viability (%) of  
570 different concentrations, fitting into the modified Gompertz function<sup>58</sup>.

571

### 572 **Data availability**

573 The genome was deposited into the NCBI BioProject database under accession  
574 PRJNA476678. The raw-reads of RNA sequencing were deposited at the  
575 Sequencing Read Archive (BioProject: PRJNA706894). All LC-MS data used in this  
576 paper are publicly available at the GNPS-MassIVE repository under the accession  
577 MSV000087007. The raw data of bottom analysis are publicly available at the

578 GNPS-MassIVE repository under the MassIVE accession MSV000087027. The  
579 coordinates and structural factors have been deposited with the Protein Data Bank  
580 under accession codes **7EI3** (MasL) and **7EI4** (MasL-Collimonin C complex)

581

## 582 **Acknowledgments**

583 We thank Dr. Chao-Jen Shih (Bioresource Collection and Research Center, Taiwan)  
584 for isolating and identifying *Massilia* sp. YMA4. The materials and methods for the  
585 construction of biosynthetic gene-null mutant strain were generously provided by  
586 Prof. Nai-Chun Lin's Lab (National Taiwan University, Taiwan). We thank Prof.  
587 Ching-Hsuan Lin and Ms. Chih-Chieh Hsu (National Taiwan University, Taiwan)  
588 for providing clinical *Candida* strains and the material for the construction of  
589 tetracycline-inducible expression system. We thank Dr. Pei-Wen Hsiao (Agricultural  
590 Biotechnology Research Center, Academia Sinica, Taiwan) for providing human  
591 prostate PC-3 cell line for cloning ACAT1 gene. We thank Mr. Ning Lu, Ms. Ying-Mi  
592 Lai, and Ms. Chia-Chi Peng for collecting preliminary data. NMR data were collected  
593 in the High Field Nuclear Magnetic Resonance Center, Academia Sinica. LC-MS  
594 data were collected in the Metabolomics Core Facility, Agricultural Biotechnology  
595 Research Center, Academia Sinica, and the Proteomics Core Laboratory, Institute of  
596 Plant and Microbial Biology, Academia Sinica. TEM data were collected in the  
597 Biological Electron Microscopy Core Facility, Academia Sinica. The EM core facility  
598 is funded by the Academia Sinica Core Facility and Innovative Instrument Project  
599 (AS-CFII-108-119). We further thank the Protein Crystallization Facility (Academia  
600 Sinica Protein Clinic, Academia Sinica) for assistance in crystallization preparation;  
601 and the National Synchrotron Radiation Research Center (Hsinchu, Taiwan) with  
602 beamlines TLS 15A and TPS 05A in the for assistance in X-ray data collection and  
603 access to the synchrotron radiation centers.

604

## 605 **Author contributions**

606 C.-C.L., S.Y.H., C.L., C.-H.S., H.-J.L., P.-Y.C., L.-J.S., B.-W.W., and W.-C.H.  
607 performed the experiments. C.-C.L., S.Y.H., K.-F.H., and Y.-N.H. carried out the data  
608 analysis. C.-C.L and S.Y.H. wrote the manuscript. Y.-L.Y. supervised the study. Y.-  
609 L.Y acquired funding to support the work.

610

## 611 **Funding**

612 This research was funded by the Ministry of Science and Technology of Taiwan  
613 (MOST 104-2320-B-001-019-MY2)

614

## 615 **Competing interests**

616 The authors declare no competing interests.

617

618

## 619 **Additional information**

620 **Supplementary information** The online version contains supplementary material  
621 available.

622 The supplementary data descriptions as following:

623 **Supplementary Data 1:** RNA-seq analysis for different culture media by CLC  
624 workbench.

625 **Supplementary Data 2:** KEGG pathway analysis of DEG from RNA-seq analysis.

626 **Supplementary Data 3:** *In silico* prediction of biosynthetic gene clusters in *Massilia*  
627 sp. YMA4 by DeepBGC and antiSMASH.

628 **Supplementary Data 4:** MultiGeneBlast results of *mas* BGC query in BCT database.

629 **Supplementary Data 5:** Phylogenetic tree of bacterial polyene biosynthetic gene  
630 clusters.

631 **Supplementary Data 6:** Bottom-up proteomics data of polyene-modification proteins.

632

633

634

635

636 **Figures and Tables**

637

638 **Table 1 | Antifungal activity of polyynes and their inhibition kinetics to MasL of**

639 ***Massilia* sp. YMA4**

| <b>Polyynes</b>       | <b>MIC (<math>\mu\text{M}</math>)<sup>a</sup></b> | <b>K<sub>i</sub> (<math>\mu\text{M}</math>)<sup>b</sup></b> | <b><math>k_{inact}</math> (<math>\text{min}^{-1}</math>)<sup>b</sup></b> | <b><math>k_{inact}/K_i</math> (<math>\mu\text{M}^{-1}\text{min}^{-1}</math>)<sup>b</sup></b> |
|-----------------------|---------------------------------------------------|-------------------------------------------------------------|--------------------------------------------------------------------------|----------------------------------------------------------------------------------------------|
| Collimonin C <b>1</b> | 69.73                                             | 297.10                                                      | 0.09798                                                                  | 0.000330                                                                                     |
| Collimonin D <b>2</b> | 35.24                                             | 42.84                                                       | 0.05208                                                                  | 0.001216                                                                                     |
| Massilin A <b>3</b>   | 2.40                                              | 132.10                                                      | 0.03449                                                                  | 0.000261                                                                                     |
| Massilin B <b>4</b>   | >500                                              | -                                                           | -                                                                        | -                                                                                            |

640 <sup>a</sup> Minimum inhibitory concentration (MIC) for *C. albicans* (**Supplementary Fig. 5**).

641 <sup>b</sup> Experimental details and statistics are provided in the **Supplementary Notes**.

642 **Table 2 | Data collection and refinement statistics**

|                                     | <b>MasL</b>            | <b>MasL-collimonin C complex</b> |
|-------------------------------------|------------------------|----------------------------------|
| <b>Data collection</b>              |                        |                                  |
| Space group                         | $P1$                   | $P2_1$                           |
| Cell dimensions                     |                        |                                  |
| <i>a</i> , <i>b</i> , <i>c</i> (Å)  | 71.786, 76.995, 98.082 | 59.139, 115.077, 125.789         |
| $\alpha$ , $\beta$ , $\gamma$ (°)   | 79.77, 79.00, 62.98    | 90.00, 91.08, 90.00              |
| Resolution (Å)                      | 30.0-1.78 (1.84-1.78)  | 30.0-1.66 (1.72-1.66)            |
| $R_{\text{merge}}$                  | 0.045 (0.233)          | 0.082 (0.560)                    |
| $I / \sigma I$                      | 23.8 (5.0)             | 17.7 (2.0)                       |
| Completeness (%)                    | 92.3 (85.2)            | 99.4 (94.4)                      |
| Redundancy                          | 3.8 (3.9)              | 5.6 (4.8)                        |
| <b>Refinement</b>                   |                        |                                  |
| Resolution (Å)                      | 29.9-1.78              | 29.2-1.66                        |
| No. reflections                     | 160,857                | 180,941                          |
| $R_{\text{work}} / R_{\text{free}}$ | 0.128/0.180            | 0.114/0.162                      |
| No. atoms                           |                        |                                  |
| Protein                             | 11,522                 | 11,544                           |
| Ligand/ion                          | -                      | 80                               |
| Water                               | 1,663                  | 1,720                            |
| <i>B</i> -factors                   |                        |                                  |
| Protein                             | 22.3                   | 18.3                             |
| Ligand/ion                          | -                      | 44.0                             |
| Water                               | 34.9                   | 34.1                             |
| R.m.s. deviations                   |                        |                                  |
| Bond lengths (Å)                    | 0.008                  | 0.009                            |
| Bond angles (°)                     | 1.455                  | 1.449                            |

643 \* Highest-resolution shell is shown in parentheses

644

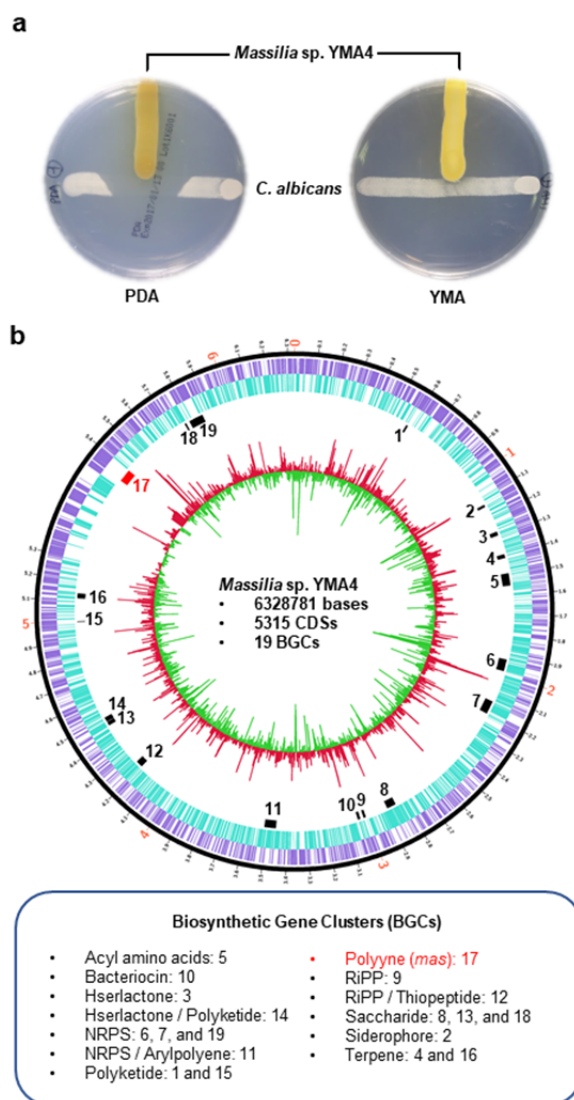

645

646 **Fig. 1 Differentiation of antifungal phenotype and differential expression of**  
 647 **biosynthetic gene clusters of *Massilia* sp. YMA4.** (a) Antagonism assay of  
 648 *Massilia* sp. YMA4 against *C. albicans* on PDA (active) and YMA (inactive) media.  
 649 (b) Whole-genome sequence and RNA-seq analysis of *Massilia* sp. YMA4 on PDA  
 650 (active) and YMA (inactive) media. Megabases are labeled as red on the outer black  
 651 track; smaller ticks correspond to 100 kbp segments. The circular tracks from outside  
 652 to inside represent: (1) coding sequences (CDSs) on the forward strand (purple); (2)  
 653 CDSs on reverse strand (blue); (3) predicted biosynthetic gene clusters (BGCs,  
 654 black and red) and polyne BGC (red); (4) fold change histogram of CDSs of  
 655 *Massilia* sp. YMA4 on PDA versus YMA; red indicates upregulation, and green  
 656 indicates downregulation.

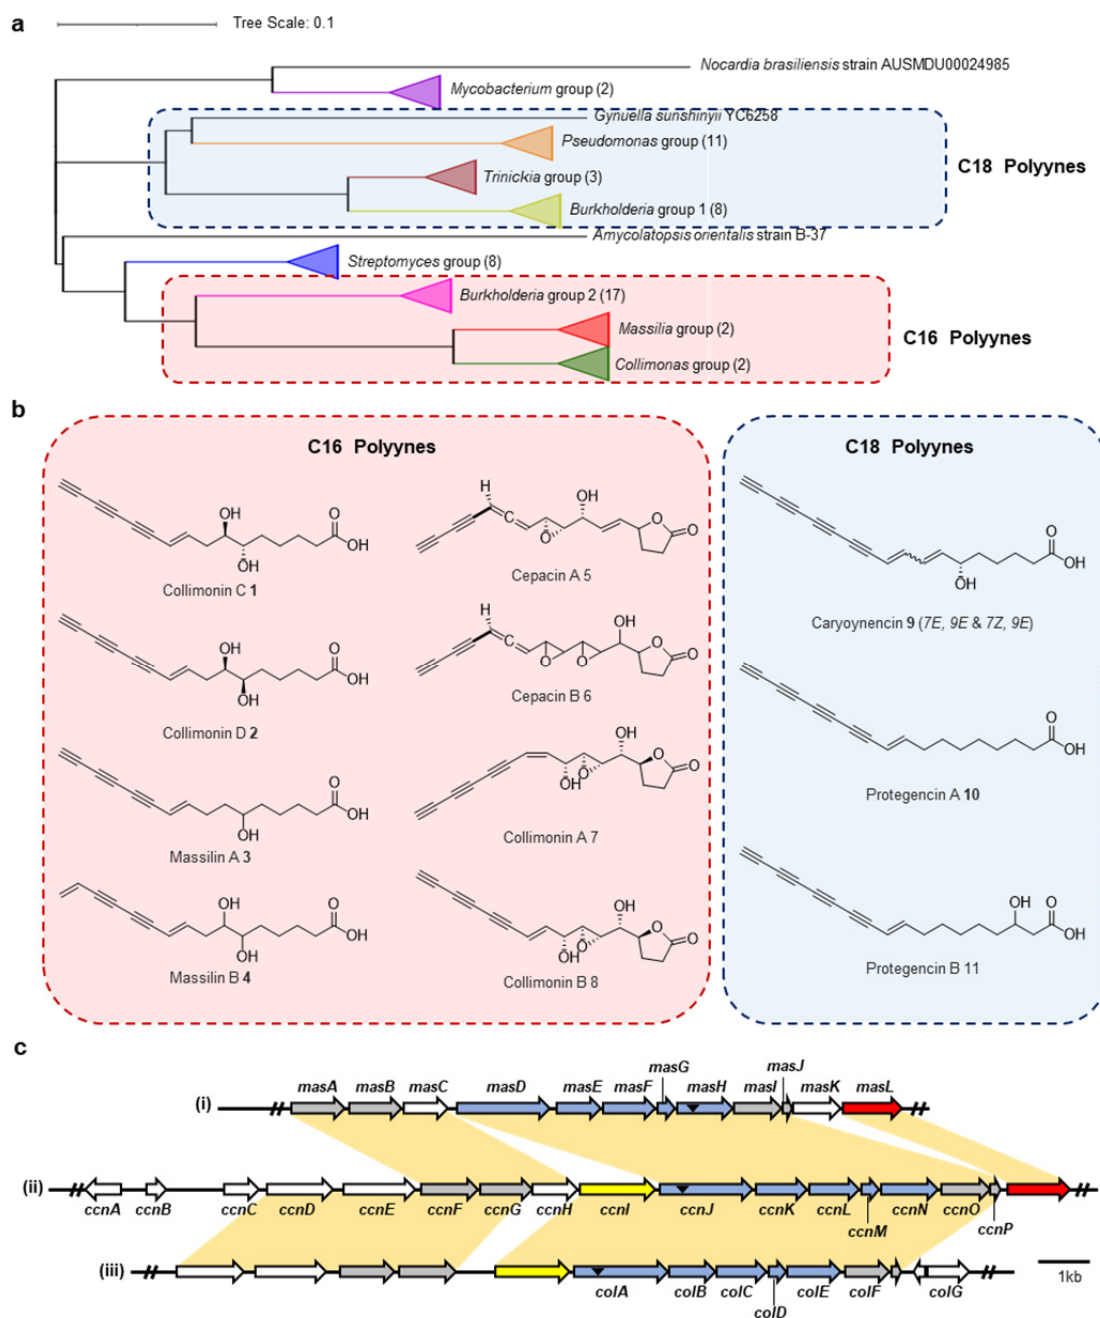

657

658 **Fig. 2 Comparative analysis of polyene biosynthetic gene cluster (BGC) and**

659 **structures of bacterial polyynes. (a) Phylogenetic analysis of polyene BGCs in 56**

660 **bacteria genomes. The polyene BGCs were mined in the NCBI BCT database (2020**

661 **version) through protein sequence homology using polyene BGC of *Massilia* sp.**

662 **YMA4 (*masA* to *masL*) as a query by MultiGeneBlast<sup>18</sup>. Species in the blue boxes**

663 **have been reported to produce C18 polyynes and species in the red boxes have**

664 **been reported to produce C16 polyynes. The phylogenetic tree was built with**

665 **concatenated protein sequences of the gene cluster's conserved region (*masD* to**

666 ***masF*) using MUSCLE alignment algorithm and distance estimated with 5000**



667 bootstraps of UPGMA method in MEGA 10<sup>45</sup>. **(b)** The chemical structures of C16 and  
668 C18 polyynes, Collimonin C **1**, collimonin D **2**, and new compounds massilin A **3**,  
669 massilin B **4** were found in *Massilia* sp. YMA4. **(c)** Comparison of the polyyne BGC  
670 architectures of *Massilia* sp. YMA4 massilins **(i)**, *B. ambifaria* BCC0191 cepacins <sup>9</sup>  
671 **(ii)**, and *C. fungivorans* Ter331 collimonins <sup>11</sup> **(iii)**. Genes conserved in polyyne  
672 BGCs across the phylogenetic tree are colored blue and those conserved in C16  
673 polyne monophylum are colored gray. The potential protective genes in BGC are  
674 colored red for acetyl-CoA acetyltransferase and yellow for MFS transporter. The  
675 corresponding homolog (over 40% identity) in BGCs between the two species are  
676 shown in the orange area. Black triangles indicate the mutation sites in previous  
677 research and this study.

678

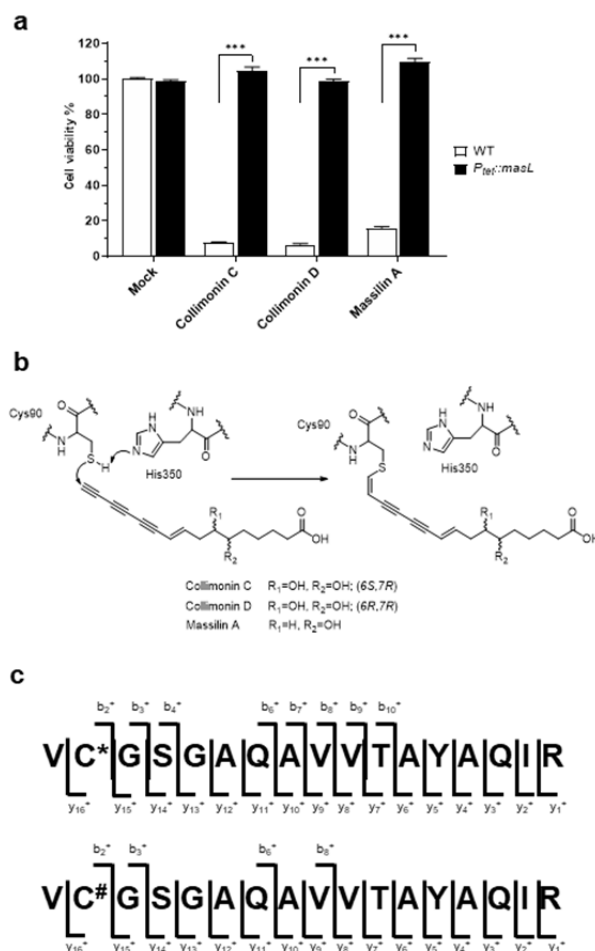

679

680 **Fig. 3 Polyynes as electrophiles for thiol-alkyne addition target MasL active**  
 681 **cysteine residue for irreversible covalent inhibition.** (a) *C. albicans* were rescued  
 682 by overexpression of *Massilia* sp. YMA4 *masL* from the minimum inhibitory  
 683 concentration of polyene treatment. The standard deviation was calculated based on  
 684 three replicates and the Student t-test was used for statistical analysis. \*\*\*,  $P <$   
 685 0.001. (b) The proposed nucleophilic addition mechanism of polyynes (with terminal  
 686 alkyne) and MasL via S-alkylation of Cys90. (c) Mass spectrometry analysis of the  
 687 polyynes-derived covalent modification on MasL Cys90 (as indicated by  $\Delta$  mass  
 688 +258 (asterisks) Da for massilins A **3** and +274 (hash mark) Da for collimonin C/D **1**,  
 689 **2**). (see details in **Supplementary Fig. 8**).

690

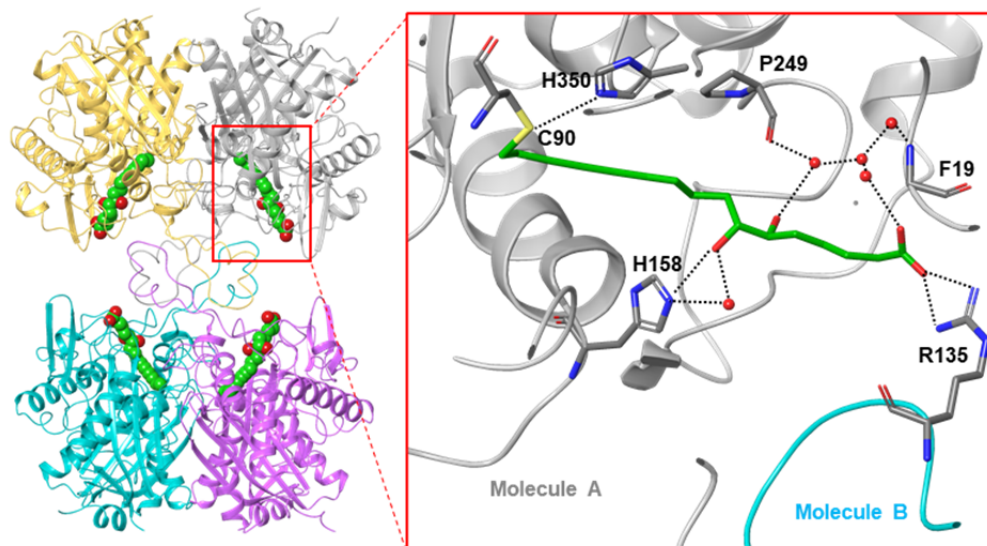

691

692 **Fig. 4 Modeled structures of MasL-collimonin C complex and polar interaction**

693 **within the binding site.** Representative views of the crystal structures of MasL in

694 complex of collimonin C 1. The residues involved in collimonin C 1 interactions are

695 shown as sticks with sequence identities indicated in the main chain molecule in gray

696 and Arg135 in another molecule in cyan color. The dotted lines indicate the hydrogen

697 bonds and salt bridge involved in collimonin C 1 interactions within the binding

698 pocket.

699

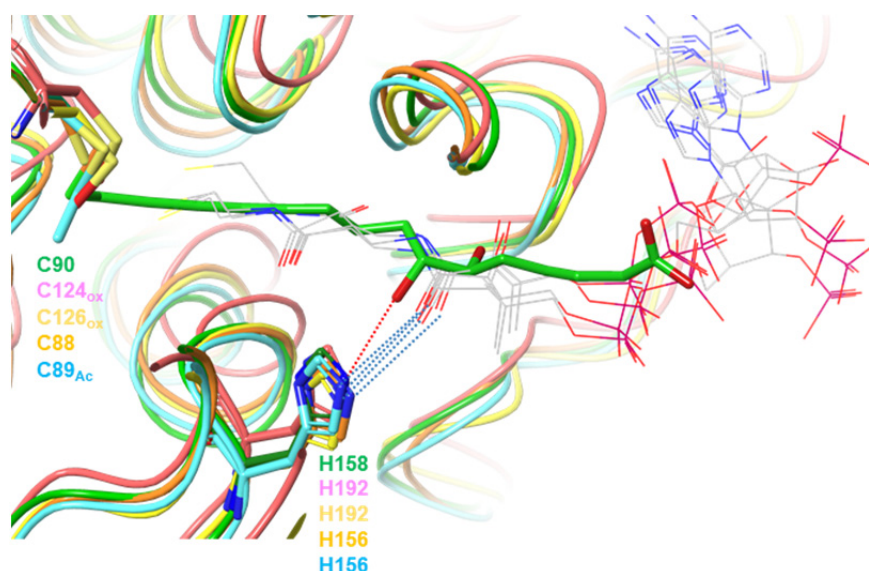

700

701 **Fig. 5 Structure comparison with ligand-bound acetyl-CoA acetyltransferase.**

702 Superposition of enzyme monomers of *Massilia* sp. YMA4 MasL bound to Collimonin  
703 C **8** (pdb code **7EI4**, chain A; green) and *A. fumigatus* ERG10A (pdb code **6L2C**,  
704 chain A<sup>32</sup>; salmon), Human ACAT1 (pdb code **2IBU**, chain A<sup>33</sup>; yellow), *C.*  
705 *acetobutylicum* CEA\_G2880 (pdb code **4XL4**, chain A<sup>31</sup>; orange), *Z. ramigera* PhaA  
706 (pdb code **1QFL**, chain A<sup>30</sup>; cyan) bound to CoA. The conserved histidine residues  
707 involved in polar interactions are shown as sticks, with sequence identities colored  
708 the same as the backbone shown as a ribbon. All CoA ligands are shown with  
709 carbon atoms in gray as lines; while collimonin C **1** is shown with carbon atoms  
710 green as sticks. The red dotted line indicates the hydrogen bonds in the MasL-  
711 collimonin C complex. The blue dotted lines indicate the water-mediated polar  
712 interactions between CoA and selected histidine residues. Abbreviations for active  
713 cysteine modification: Ox, oxidized form of the cysteine thiol group (sulfenic acid  
714 type); Ac, acetylation of the cysteine residue.

715

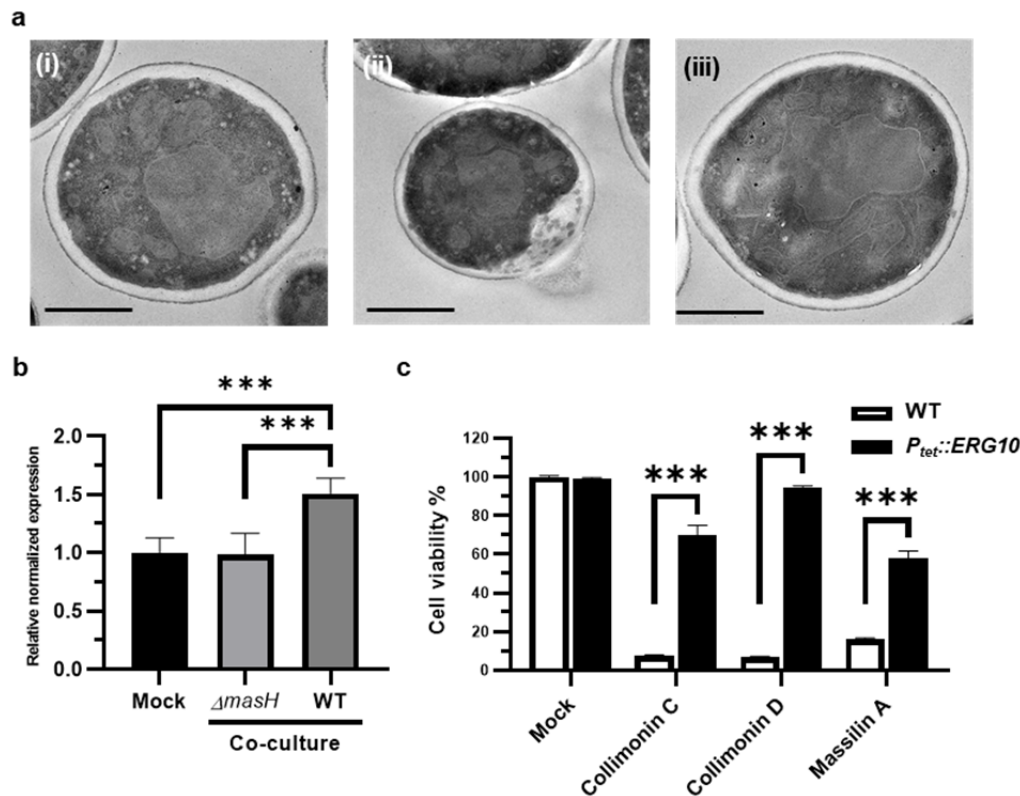

716

717 **Fig. 6 Polyynes inhibit *C. albicans* through disruption of cell membrane**  
 718 **stability.** (a) Transmission electron microscopy images of *C. albicans* cells treated  
 719 with Mock (i) and 1 mg/mL *Massilia* sp. YMA4 ethyl acetate crude extract (ii). Cells  
 720 treated with 1 mg/mL  $\Delta masH$  ethyl acetate crude extract (iii) were used as a  
 721 negative control. Scale bar, 1  $\mu$ m. (b) Gene expression of *ERG10* in *C. albicans* co-  
 722 cultured with  $\Delta masH$  and *Massilia* sp. YMA for two days revealed by real-time qPCR.  
 723 Mock represents *C. albicans* growth alone. *C. albicans Act1* was used for internal  
 724 normalization, and *ERG10* expression levels were further normalized to the Mock  
 725 condition. The standard error of the mean (SEM) was calculated based on at least  
 726 three replicates and the Student t-test was used for statistical analysis. \*\*\*,  $P < 0.001$ .  
 727 (c) *C. albicans* are rescued by overexpression of *C. albicans ERG10* from the  
 728 minimum inhibitory concentration of polyne treatment (collimonin C/D **1**, **2**, and  
 729 massilin A **3**). The standard deviation was calculated based on three replicates and  
 730 the Student t-test was used for statistical analysis. \*\*\*,  $P < 0.001$ .

731

## 732 References

- 733 1. Sanglard D. Emerging Threats in Antifungal-Resistant Fungal Pathogens. **3**, (2016).  
734
- 735 2. Sardi JCO, Scorzoni L, Bernardi T, Fusco-Almeida AM, Mendes Giannini MJS. Candida  
736 species: current epidemiology, pathogenicity, biofilm formation, natural antifungal  
737 products and new therapeutic options. *Journal of medical microbiology* **62**, 10-24  
738 (2013).  
739
- 740 3. Pappas PG, *et al.* Clinical Practice Guideline for the Management of Candidiasis: 2016  
741 Update by the Infectious Diseases Society of America. *Clinical infectious diseases : an*  
742 *official publication of the Infectious Diseases Society of America* **62**, e1-50 (2016).  
743
- 744 4. Lee Y, Puumala E, Robbins N, Cowen LE. Antifungal Drug Resistance: Molecular  
745 Mechanisms in *Candida albicans* and Beyond. *Chemical Reviews*, (2020).  
746
- 747 5. Yassin MT, Mostafa AA, Al-Askar AA, Bdeer R. In vitro antifungal resistance profile of  
748 *Candida* strains isolated from Saudi women suffering from vulvovaginitis. *European*  
749 *Journal of Medical Research* **25**, 1 (2020).  
750
- 751 6. Bhattacharya S, Sae-Tia S, Fries BC. Candidiasis and Mechanisms of Antifungal  
752 Resistance. *Antibiotics (Basel)* **9**, 312 (2020).  
753
- 754 7. Wall G, Lopez-Ribot JL. Current Antimycotics, New Prospects, and Future Approaches  
755 to Antifungal Therapy. *Antibiotics (Basel)* **9**, 445 (2020).  
756
- 757 8. Negri R. Polyacetyles from terrestrial plants and fungi: Recent phytochemical and  
758 biological advances. *Fitoterapia* **106**, 92-109 (2015).  
759
- 760 9. Mullins AJ, *et al.* Genome mining identifies cepacin as a plant-protective metabolite  
761 of the biopesticidal bacterium *Burkholderia ambifaria*. *Nat Microbiol* **4**, 996-1005  
762 (2019).  
763
- 764 10. W L Parker MLR, V Seiner, W H Trejo, P A Principe, R B Sykes. Cepacin A and cepacin  
765 B, two new antibiotics produced by *Pseudomonas cepacia*. *J Antibiot (Tokyo)* **37**,  
766 431-440 (1984).  
767
- 768 11. Kai K, Sogame M, Sakurai F, Nasu N, Fujita M. Collimonins A–D, Unstable Polyynes  
769 with Antifungal or Pigmentation Activities from the Fungus-Feeding Bacterium  
770 *Collimonas fungivorans* Ter331. *Organic Letters* **20**, 3536-3540 (2018).  
771
- 772 12. Fritsche K, *et al.* Biosynthetic genes and activity spectrum of antifungal polyynes  
773 from *Collimonas fungivorans* Ter331. *Environ Microbiol* **16**, 1334-1345 (2014).  
774
- 775 13. M Patel MC, A Horan, D Loebenberg, J Marquez, R Mierzwa, M S Puar, R Yarborough,  
776 J A Waitz. Sch 31828, a novel antibiotic from a *Microbispora* sp. taxonomy,

- 777 fermentation, isolation and biological properties. *J Antibiot (Tokyo)* **41**, 794-797  
778 (1988).  
779
- 780 14. Chen PY, Lu N, Lai YM, Yang YL. Anti-microbial metabolites from a marine bacterium  
781 YMA4. *Planta Med* **82**, P593 (2016).  
782
- 783 15. Kanehisa M, Furumichi M, Tanabe M, Sato Y, Morishima K. KEGG: new perspectives  
784 on genomes, pathways, diseases and drugs. *Nucleic Acids Res* **45**, D353-D361 (2017).  
785
- 786 16. Blin K, Shaw S, Kautsar SA, Medema MH, Weber T. The antiSMASH database version  
787 3: increased taxonomic coverage and new query features for modular enzymes.  
788 *Nucleic Acids Res* **49**, D639-D643 (2021).  
789
- 790 17. Hannigan GD, *et al.* A deep learning genome-mining strategy for biosynthetic gene  
791 cluster prediction. *Nucleic Acids Research* **47**, e110-e110 (2019).  
792
- 793 18. Medema MH, Takano E, Breitling R. Detecting sequence homology at the gene  
794 cluster level with MultiGeneBlast. *Mol Biol Evol* **30**, 1218-1223 (2013).  
795
- 796 19. Kusumi T, Ohtani I, Nishiyama K, Kakisawa H. Caryophyllins, potent antibiotics from  
797 a plant pathogen *Pseudomonas caryophylli*. *Tetrahedron Letters* **28**, 3981-3984  
798 (1987).  
799
- 800 20. Ross C, Scherlach K, Kloss F, Hertweck C. The molecular basis of conjugated polyene  
801 biosynthesis in phytopathogenic bacteria. *Angew Chem Int Ed Engl* **53**, 7794-7798  
802 (2014).  
803
- 804 21. Murata K, Kenji K. Characterization of bacterial polyene protegenins produced by  
805 *Pseudomonas protegens*. *Pesticide Science Society of Japan* **45**, 135  
806 [https://jglobal.ist.go.jp/en/detail?JGLOBAL\\_ID=202002231826011297](https://jglobal.ist.go.jp/en/detail?JGLOBAL_ID=202002231826011297) (2020).  
807
- 808 22. Ueoka R, *et al.* Genome-Based Identification of a Plant-Associated Marine Bacterium  
809 as a Rich Natural Product Source. *Angewandte Chemie International Edition* **57**,  
810 14519-14523 (2018).  
811
- 812 23. A KR, Shah AH, Prasad R. MFS transporters of *Candida* species and their role in  
813 clinical drug resistance. *FEMS Yeast Res* **16**, (2016).  
814
- 815 24. Yan Y, Liu N, Tang Y. Recent developments in self-resistance gene directed natural  
816 product discovery. *Natural Product Reports* **37**, 879-892 (2020).  
817
- 818 25. Hobson C, Chan AN, Wright GD. The Antibiotic Resistome: A Guide for the Discovery  
819 of Natural Products as Antimicrobial Agents. *Chemical Reviews* **121**, 3464-3494  
820 (2021).  
821
- 822 26. Chopra I. Over-expression of target genes as a mechanism of antibiotic resistance in  
823 bacteria. *The Journal of antimicrobial chemotherapy* **41**, 584-588 (1998).

- 824  
825 27. Sutanto F, Konstantinidou M, Domling A. Covalent inhibitors: a rational approach to  
826 drug discovery. *RSC Med Chem* **11**, 876-884 (2020).  
827
- 828 28. Fan J, *et al.* Tetrameric Acetyl-CoA Acetyltransferase 1 Is Important for Tumor  
829 Growth. *Mol Cell* **64**, 859-874 (2016).  
830
- 831 29. Ohnuma T, Nakayama S, Anan E, Nishiyama T, Ogura K, Hiratsuka A. Activation of the  
832 Nrf2/ARE pathway via S-alkylation of cysteine 151 in the chemopreventive agent-  
833 sensor Keap1 protein by falcarindiol, a conjugated diacetylene compound. *Toxicol*  
834 *Appl Pharmacol* **244**, 27-36 (2010).  
835
- 836 30. Modis Y, Wierenga RK. A biosynthetic thiolase in complex with a reaction  
837 intermediate: the crystal structure provides new insights into the catalytic  
838 mechanism. *Structure* **7**, 1279-1290 (1999).  
839
- 840 31. Kim S, *et al.* Redox-switch regulatory mechanism of thiolase from *Clostridium*  
841 *acetobutylicum*. *Nat Commun* **6**, 8410 (2015).  
842
- 843 32. Zhang Y, Wei W, Fan J, Jin C, Lu L, Fang W. *Aspergillus fumigatus* Mitochondrial  
844 Acetyl Coenzyme A Acetyltransferase as an Antifungal Target. *Appl Environ Microbiol*  
845 **86**, (2020).  
846
- 847 33. Haapalainen AM, Meriläinen G, Pirilä PL, Kondo N, Fukao T, Wierenga RK.  
848 Crystallographic and Kinetic Studies of Human Mitochondrial Acetoacetyl-CoA  
849 Thiolase: The Importance of Potassium and Chloride Ions for Its Structure and  
850 Function. *Biochemistry* **46**, 4305-4321 (2007).  
851
- 852 34. Modis Y, Wierenga RK. A biosynthetic thiolase in complex with a reaction  
853 intermediate: the crystal structure provides new insights into the catalytic  
854 mechanism. *Structure* **7**, 1279-1290 (1999).  
855
- 856 35. Lewis K. Platforms for antibiotic discovery. *Nat Rev Drug Discov* **12**, 371-387 (2013).  
857
- 858 36. Chen A, Re RN, Burkart MD. Type II fatty acid and polyketide synthases: deciphering  
859 protein-protein and protein-substrate interactions. *Nat Prod Rep* **35**, 1029-1045  
860 (2018).  
861
- 862 37. Soucy SM, Huang J, Gogarten JP. Horizontal gene transfer: building the web of life.  
863 *Nat Rev Genet* **16**, 472-482 (2015).  
864
- 865 38. Palmer AC, Kishony R. Opposing effects of target overexpression reveal drug  
866 mechanisms. *Nature Communications* **5**, 4296 (2014).  
867
- 868 39. Sugden CJ, Roper JR, Williams JG. Engineered gene over-expression as a method of  
869 drug target identification. *Biochemical and Biophysical Research Communications*  
870 **334**, 555-560 (2005).



- 871  
872 40. Saraon P, *et al.* Evaluation and prognostic significance of ACAT1 as a marker of  
873 prostate cancer progression. *Prostate* **74**, 372-380 (2014).  
874  
875 41. Jiang P, *et al.* In vitro and in vivo anticancer effects of mevalonate pathway  
876 modulation on human cancer cells. *Br J Cancer* **111**, 1562-1571 (2014).  
877  
878 42. Bloxham DP, Chalkley RA, Coghlin SJ, Salam W. Synthesis of chloromethyl ketone  
879 derivatives of fatty acids. Their use as specific inhibitors of acetoacetyl-coenzyme A  
880 thiolase, cholesterol biosynthesis and fatty acid synthesis. *Biochemical Journal* **175**,  
881 999-1011 (1978).  
882  
883 43. Holland PC, Clark MG, Bloxham DP. Inactivation of pig heart thiolase by 3-butynoyl  
884 coenzyme A, 3-pentynoyl coenzyme A, and 4-bromocrotonyl coenzyme A.  
885 *Biochemistry* **12**, 3309-3315 (1973).  
886  
887 44. Palmer MA, *et al.* Biosynthetic thiolase from *Zoogloea ramigera*. Evidence for a  
888 mechanism involving Cys-378 as the active site base. *The Journal of biological*  
889 *chemistry* **266**, 8369-8375 (1991).  
890  
891 45. Kumar S, Stecher G, Li M, Knyaz C, Tamura K. MEGA X: Molecular Evolutionary  
892 Genetics Analysis across Computing Platforms. *Molecular biology and evolution* **35**,  
893 1547-1549 (2018).  
894  
895 46. Letunic I, Bork P. Interactive Tree Of Life (iTOL) v4: recent updates and new  
896 developments. *Nucleic Acids Research* **47**, W256-W259 (2019).  
897  
898 47. Shevchenko A, Tomas H, Havlis J, Olsen JV, Mann M. In-gel digestion for mass  
899 spectrometric characterization of proteins and proteomes. *Nat Protoc* **1**, 2856-2860  
900 (2006).  
901  
902 48. Diament BJ, Noble WS. Faster SEQUEST searching for peptide identification from  
903 tandem mass spectra. *J Proteome Res* **10**, 3871-3879 (2011).  
904  
905 49. Long T, Sun Y, Hassan A, Qi X, Li X. Structure of nevanimibe-bound tetrameric human  
906 ACAT1. *Nature* **581**, 339-343 (2020).  
907  
908 50. Otwinowski Z, Minor W. Processing of X-ray diffraction data collected in oscillation  
909 mode. *Methods in enzymology* **276**, 307-326 (1997).  
910  
911 51. Kantardjieff KA, Rupp B. Matthews coefficient probabilities: Improved estimates for  
912 unit cell contents of proteins, DNA, and protein–nucleic acid complex crystals.  
913 *Protein Science* **12**, 1865-1871 (2003).  
914  
915 52. Vagin A, Teplyakov A. Molecular replacement with MOLREP. *Acta crystallographica*  
916 *Section D, Biological crystallography* **66**, 22-25 (2010).  
917

- 918 53. Cowtan K. The Buccaneer software for automated model building. 1. Tracing protein  
919 chains. *Acta crystallographica Section D, Biological crystallography* **62**, 1002-1011  
920 (2006).  
921
- 922 54. Perrakis A, Morris R, Lamzin VS. Automated protein model building combined with  
923 iterative structure refinement. *Nature structural biology* **6**, 458-463 (1999).  
924
- 925 55. Emsley P, Cowtan K. Coot: model-building tools for molecular graphics. *Acta*  
926 *crystallographica Section D, Biological crystallography* **60**, 2126-2132 (2004).  
927
- 928 56. Murshudov GN, *et al.* REFMAC5 for the refinement of macromolecular crystal  
929 structures. *Acta Crystallographica Section D* **67**, 355-367 (2011).  
930
- 931 57. Williams CJ, *et al.* MolProbity: More and better reference data for improved all-atom  
932 structure validation. *Protein science : a publication of the Protein Society* **27**, 293-315  
933 (2018).  
934
- 935 58. Lambert RJW, Pearson J. Susceptibility testing: accurate and reproducible minimum  
936 inhibitory concentration (MIC) and non-inhibitory concentration (NIC) values. *Journal*  
937 *of Applied Microbiology* **88**, 784-790 (2000).  
938
- 939
